# Supplementary material for: Fusobacterium-associated molecular and immunological alterations in colorectal cancer: Insights from a Norwegian cohort
Source: Frontiers journal article supplement (doi:10.3389/fimmu.2025.1601423), 2025-08-14
Supplement: Table_1.xlsx [file Table_1.xlsx]

## Sheet: Table 1
Table 1A: Target Genes and Corresponding Assay IDs for PCR Analysis
Target Gene	Assay ID (Applied Biosystems)	Chromosome Location
CXCL1	Hs00236937_m1	Chr.4: 73869392 - 73871302 on Build GRCh38
IL6	Hs00174131_m1	Chr.7: 22725889 - 22732002 on Build GRCh38
IL8 (CXCL8)	Hs00174103_m1	Chr.4: 73740506 - 73743716 on Build GRCh38
GAPDH (HKG)	Hs99999905_m1	Chr.12: 6534405 - 6538375 on Build GRCh38
POLR2A (HKG)	Hs00172187_m1	Chr.17: 7484379 - 7514618 on Build GRCh38
INFG (Interferon-γ)	Hs00989291_m1	Chr.12: 68154770 - 68159741 on Build GRCh38
IL10	Hs00961622_m1	Chr.1: 206767603 - 206772494 on Build GRCh38
iNOS (NOS2)	Hs01075529_m1	Chr.17: 27756766 - 27804339 on Build GRCh38
Arginase 1 (ARG1)	Hs00163660_m1	Chr.6: 131573159 - 131584332 on Build GRCh38
CD206 (MRC1: Mannose receptor C type 1-like)	Hs07288635_g1	Chr.10: 17809343 - 17911162 on Build GRCh38
CD209	Hs01588349_m1	Chr.19: 7739993 - 7747609 on Build GRCh38
c-Myc	Hs00153408_m1	Chr.2: 112829758 - 112836842 on Build GRCh38
Cyclin D1	Hs00765553_m1	Chr.11: 69641105 - 69654474 on Build GRCh38
Table 1B: antibody clones.
Antigen	Clone	Isotype	Dilution and HP
IL8	ABIN1724413	Monoclonal mouse IgG1	1:400 high
STAT3	ABIN2855865	Polyclonal rabbit	1:50 low
CD163 (M2 macrophages)	Sc-20066	Monoclonal mouse IgG1	1:25 high
C-Myc	EP121	Monoclonal rabbit	1:25 low
CD68 (macrophages and myelomonocytic cells)	PG-M1	Monoclonal mouse IgG3	1:100 high
Table 1C: Primer Sequences
Promoter Region	Primer Sequence (5' → 3')	GenBank Accession Number / Position*	CpG Count / Amplicon Length
MGMT	MS-HRM2_F: GCGTTTCGGATATGTTGGGATAGT	Chr10:131,155,459–131,155,568**	12 / 109 bp
	MS-HRM2_R: AACGACCCAAACACTCACCAAA
MLH1	MLH1_F: TTTTTTTAGGAGTGAAGGAGG	AY217549	13 / 123 bp
	MLH1_R: AACRCCACTACRAAACTAAA*
* R = A or G
** Position according to UCSC Genome Browser
Primers are complementary to bisulfite-treated DNA.

## Sheet: Table 2
Table 2A: Primers and probes for Fap2 and nusG PCR assays
Assay		Sequence (5’-3’)	Position	Tm°C	Reference
Fap2 all	F	CAGGAGGAAARGCAACAAATAAA (Sense)	9167-9190	62	This study
	R	GGCAGCCATTCCTATWCCATAA (AntiSense)	9267-9289	62	This study
	Probe	ACTGATGAYATAGAYCCAATGACTGGA (Sense)	9211-9238	67	This study
Fap2 ani	F	CAGGAGGAAARGCAACAAATAAA (Sense)	9167-9190	62	This study
	R	ATCRGCAGCCATTCCTATACC	9171-9192	62	This study
	Probe	TGGGTCTATATCATCAGCTGCTCCAAC (AntiSense)	9102-9129	67	This study
NusG	F	GCTTGAAATGGAAGCWACAAGAG			Senthakumaran et al., 2023
	R	CCAACTCCTACAAAYCCAGTAAC			Senthakumaran et al., 2023
	Probe	AGTAGATCCTCGTGTATGGTATGAAGT			Senthakumaran et al., 2023
Table 2B: Specificity testing of Fap2 PCR assays
Test strain	Fap2 all PCR (Ct)	Fap2 ani PCR (Ct)
Fusobacterium nucleatum CCUG 33059T	17.05	Undetermined
Fusobacterium animalis CCUG 32879T	29.33	27.39
Fusobacterium vincentii CCUG 37843T	17.88	Undetermined
Fusobacterium polymorphum CCUG 60920	Undetermined	Undetermined
Fusobacterium necrophorum ssp. funduliforme CCUG 59679	Undetermined	Undetermined
Fusobacterium periodonticum CCUG 51780	Undetermined	Undetermined
Fusobacterium naviforme CCUG 50052T	Undetermined	Undetermined
Fusobacterium gonidiaformans*	Undetermined	Undetermined
Fusobacterium varium CCUG 4858T	Undetermined	Undetermined
Leptotrichia shahii CCUG 47503T	Undetermined	Undetermined
Leptotrichia wadei CCUG 63608	Undetermined	Undetermined
Leptotrichia goodfellowii CCUG 53232	Undetermined	Undetermined
Leptotrichia hofstadii CCUG 47504T	Undetermined	Undetermined
Leptotrichia bucc ?? har vi denne?	Undetermined	Undetermined
Leptotrichia tre visanii CCUG 72923	Undetermined	Undetermined
Negative amplification control (H2O)	Undetermined	Undetermined
* clinical isolate identified with 16S rRNA Sanger sequencing

## Sheet: Table 3
Table 3: Differentially expressed genes (DEGs) Fusobacterium High/Low
Name	Fold Change	p-Value	p-Adj	Description	Alias
BCL6	2.64621	0.001735	0.01823	B-cell CLL/lymphoma 6	BCL5, BCL6A, LAZ3, ZBTB27, ZNF51
BST2	3.20855	0.002804	0.023292	bone marrow stromal cell antigen 2	CD317, TETHERIN
C1R	2.07462	0.004297	0.029121	complement component 1, r subcomponent	-
CCL18	4.41551	0.008233	0.048851	chemokine (C-C motif) ligand 18 (pulmonary and activation-regulated)	AMAC-1, AMAC1, CKB7, DC-CK1, DCCK1, MIP-4, PARC, SCYA18
CCL2	3.92763	0.001809	0.018637	chemokine (C-C motif) ligand 2	GDCF-2, HC11, HSMCR30, MCAF, MCP-1, MCP1, SCYA2, SMC-CF
CCL3	17.3923	9.65e-06	0.001402	chemokine (C-C motif) ligand 3	G0S19-1, LD78ALPHA, MIP-1-ALPHA, MIP1A, SCYA3
CCL4	6.36178	9.19e-05	0.005042	chemokine (C-C motif) ligand 4	ACT2, AT744,1, G-26, HC21, LAG-1, LAG1, MIP-1-BETA, MIP1B, MIP1B1, SCYA2, SCYA4
CCR1	2.26239	0.00289	0.023623	chemokine (C-C motif) receptor 1	CD191, CKR-1, CKR1, CMKBR1, HM145, MIP1AR, SCYAR1
CD274	4.67511	0.001475	0.017661	CD274 molecule	PD1L, B7-H, B7H1, PD-L1, PDCD1L1, PDCD1LG1, PDL1, CD274 (PD-L1)
CD40	2.26089	0.003674	0.02665	CD40 molecule, TNF receptor superfamily member 5	BP50, CDW40, TNFRSF5, P50
CD80	2.29822	0.004572	0.030582	CD80 molecule	B7, B7-1, B7,1, BB1, CD28LG, CD28LG1, LAB7
CD82	1.88638	0.001708	0.01823	CD82 molecule	4F9, C33, GR15, IA4, KAI1, R2, SAR2, ST6, TSPAN27
CD86	2.39546	0.002586	0.022114	CD86 molecule	B7-2, B7,2, B70, CD28LG2, LAB72
CDKN1A	-2.08788	0.006992	0.042866	cyclin-dependent kinase inhibitor 1A (p21, Cip1)	CAP20, CDKN1, CIP1, MDA-6, P21, SDI1, WAF1, P21CIP1
CLEC4A	2.19336	0.003947	0.028231	C-type lectin domain family 4, member A	CD367, CLECSF6, DCIR, DDB27, HDCGC13P, LLIR
CLEC4E	4.50504	0.001523	0.017823	C-type lectin domain family 4, member E	CLECSF9, MINCLE
CLEC5A	22.3653	4.02e-06	0.001402	C-type lectin domain family 5, member A	CLECSF5, MDL-1, MDL1
CSF2	8.88302	0.000389	0.0098	colony stimulating factor 2 (granulocyte-macrophage)	GMCSF
CSF3R	5.4998	0.000118	0.005079	colony stimulating factor 3 receptor (granulocyte)	CD114, GCSFR
CX3CL1	2.08891	0.004054	0.0286	chemokine (C-X3-C motif) ligand 1	ABCD-3, C3XKINE, CXC3, CXC3C, NTN, NTT, SCYD1, FRACTALKINE, NEUROTACTIN
CXCL1	3.55239	0.003524	0.025929	chemokine (C-X-C motif) ligand 1 (melanoma growth stimulating activity, alpha)	FSP, GRO1, GROA, MGSA, MGSA-A, NAP-3, SCYB1
CXCL10	5.41004	0.000304	0.0098	chemokine (C-X-C motif) ligand 10	C7, IFI10, INP10, IP-10, SCYB10, CRG-2, GIP-10, MOB-1
CXCL11	8.18311	0.000399	0.0098	chemokine (C-X-C motif) ligand 11	H174, I-TAC, IP-9, IP9, SCYB11, SCYB9B, B-R1
CXCL2	3.84398	0.002619	0.022114	chemokine (C-X-C motif) ligand 2	CINC-2A, GRO2, GROB, MGSA-B, MIP-2A, MIP2, MIP2A, SCYB2
CXCL8	26.6501	5.97e-06	0.001402	chemokine (C-X-C motif) ligand 8	GCP-1, GCP1, IL8, LECT, LUCT, LYNAP, MDNCF, MONAP, NAF, NAP-1, NAP1, IL-8
CXCR1	5.61027	0.001686	0.01823	chemokine (C-X-C motif) receptor 1	C-C, C-C-CKR-1, CD128, CD181, CDW128A, CKR-1, CMKAR1, IL8R1, IL8RA, IL8RBA
CXCR2	3.60086	0.00207	0.019102	chemokine (C-X-C motif) receptor 2	CD182, CDW128B, CMKAR2, IL8R2, IL8RA, IL8RB
DEFB4A	-4.14686	0.001407	0.017258	defensin, beta 4A	BD-2, DEFB-2, DEFB102, DEFB2, DEFB4, HBD-2, SAP1
FCGR2A	5.53077	5.53e-05	0.004066	Fc fragment of IgG, low affinity IIa, receptor (CD32)	CD32, CD32A, CDW32, FCG2, FCGR2, FCGR2A1, FCGR, IGFR2
FCGR2A/C	3.72301	0.000415	0.0098
FCGR2B	4.07124	0.001929	0.018678	Fc fragment of IgG, low affinity IIb, receptor (CD32)	CD32, CD32B, FCG2, FCGR2, IGFR2
FCGR3A/B	3.00703	0.000991	0.013799
FN1	6.1641	0.000108	0.005042	fibronectin 1	CIG, ED-B, FINC, FN, FNZ, GFND, GFND2, LETS, MSF
GBP5	4.84834	0.000354	0.0098	guanylate binding protein 5	GBP-5
GNLY	4.27265	0.003494	0.025929	granulysin	D2S69E, LAG-2, LAG2, NKG5, TLA519
HAVCR2	3.12449	0.000375	0.0098	hepatitis A virus cellular receptor 2	CD366, HAVCR-2, KIM-3, TIM3, TIMD-3, TIMD3, TIM-3, HAVCR2 (TIM-3)
ICAM1	5.34733	0.000103	0.005042	intercellular adhesion molecule 1	BB2, CD54, P3,58
IDO1	11.1853	4.91e-05	0.004066	indoleamine 2,3-dioxygenase 1	IDO, IDO-1, INDO
IL18RAP	5.3223	0.004245	0.029121	interleukin 18 receptor accessory protein	ACPL, CD218B, CDW218B, IL-18R-BETA, IL-18RACP, IL-18RBETA, IL-1R-7, IL-1R7, IL-1RACPL, IL18RB
IL1B	15.1737	1.09e-05	0.001402	interleukin 1, beta	IL-1, IL1-BETA, IL1F2, IL-1B
IL1RAP	2.3407	0.001558	0.017831	interleukin 1 receptor accessory protein	C3ORF13, IL-1RACP, IL1R3
IL1RN	5.74143	0.000821	0.01208	interleukin 1 receptor antagonist	DIRA, ICIL-1RA, IL-1RN, IL-1RA, IL-1RA3, IL1F3, IL1RA, IRAP, MVCD4
IL6	14.666	0.008252	0.048851	interleukin 6	BSF2, HGF, HSF, IFNB2, IL-6
IRAK3	3.31378	0.001199	0.015832	interleukin-1 receptor-associated kinase 3	IRAK-3, ASRT5, IRAKM
IRF5	2.17032	0.000732	0.011426	interferon regulatory factor 5	SLEB10
ITGA5	5.03398	6.47e-05	0.004163	integrin, alpha 5 (fibronectin receptor, alpha polypeptide)	CD49E, FNRA, VLA-5, VLA5A
ITGAM	3.09642	0.001959	0.018678	integrin, alpha M (complement component 3 receptor 3 subunit)	CD11B, CR3A, MAC-1, MAC1A, MO1A, SLEB6
ITGAX	3.43379	0.000661	0.011426	integrin, alpha X (complement component 3 receptor 4 subunit)	CD11C, SLEB6
ITGB2	2.34588	0.002483	0.022044	integrin, beta 2 (complement component 3 receptor 3 and 4 subunit)	CD18, LAD, LCAMB, LFA-1, MAC-1, MF17, MFI7
ITLN2	-17.7157	1.67e-05	0.001724	intelectin 2	HL-2, HL2
LCP2	2.50966	0.001957	0.018678	lymphocyte cytosolic protein 2 (SH2 domain containing leukocyte protein of 76kDa)	SLP-76, SLP76
LILRA3	5.58068	0.000894	0.012791	leukocyte immunoglobulin-like receptor, subfamily A (without TM domain), member 3	CD85E, HM31, HM43, ILT-6, ILT6, LIR-4, LIR4
LILRA5	3.26583	0.000422	0.0098	leukocyte immunoglobulin-like receptor, subfamily A (with TM domain), member 5	CD85, CD85F, ILT-11, ILT11, LILRB7, LIR-9, LIR9
LILRB2	3.28504	0.000459	0.009847	leukocyte immunoglobulin-like receptor, subfamily B (with TM and ITIM domains), member 2	CD85D, ILT-4, ILT4, LIR-2, LIR2, MIR-10, MIR10
LILRB3	3.99615	0.001598	0.017894	leukocyte immunoglobulin-like receptor, subfamily B (with TM and ITIM domains), member 3	CD85A, HL9, ILT-5, ILT5, LILRA6, LIR-3, LIR3, PIRB
LILRB4	2.89329	0.005001	0.033017	leukocyte immunoglobulin-like receptor, subfamily B (with TM and ITIM domains), member 4	CD85K, ILT-3, ILT3, LIR-5, LIR5
MAP4K4	1.69336	0.005991	0.038091	mitogen-activated protein kinase kinase kinase kinase 4	FLH21957, HEL-S-31, HGK, MEKKK4, NIK
MIF	1.68208	0.003327	0.025197	macrophage migration inhibitory factor (glycosylation-inhibiting factor)	GIF, GLIF, MMIF
MME	4.28992	0.0054	0.034759	membrane metallo-endopeptidase	CALLA, CD10, NEP, SFE
MSR1	3.03427	0.000482	0.009938	macrophage scavenger receptor 1	CD204, SCARA1, SR-A, SRA, PHSR1, PHSR2
NFKB2	2.01891	0.003309	0.025197	nuclear factor of kappa light polypeptide gene enhancer in B-cells 2 (p49/p100)	CVID10, H2TF1, LYT-10, LYT10, NF-KB2, P100, P52
NFKBIA	2.02153	0.005334	0.034759	nuclear factor of kappa light polypeptide gene enhancer in B-cells inhibitor, alpha	IKBA, MAD-3, NFKBI
NLRP3	5.57322	0.000624	0.011426	NLR family, pyrin domain containing 3	AGTAVPRL, AII, AVP, C1ORF7, CIAS1, CLR1,1, FCAS, FCAS1, FCU, MWS, NALP3, PYPAF1
PDGFB	2.63229	0.002252	0.020346	platelet-derived growth factor beta polypeptide	IBGC5, PDGF-2, PDGF2, SIS, SSV, C-SIS
PDGFRB	2.93903	0.000364	0.0098	platelet-derived growth factor receptor, beta polypeptide	CD140B, IBGC4, IMF1, JTK12, PDGFR, PDGFR-1, PDGFR1
PLAU	4.96337	0.000251	0.0098	plasminogen activator, urokinase	ATF, BDPLT5, QPD, UPA, URK, U-PA, PLAU (UPA)
PRF1	4.70991	0.000723	0.011426	perforin 1 (pore forming protein)	FLH2, HPLH2, P1, PFN1, PFP, PERFORIN
PTAFR	3.63015	0.000565	0.010769	platelet-activating factor receptor	PAFR
PTGS2	7.45739	0.000721	0.011426	prostaglandin-endoperoxide synthase 2 (prostaglandin G/H synthase and cyclooxygenase)	COX-2, COX2, GRIPGHS, PGG/HS, PGHS-2, PHS-2, HCOX-2
S100A8	5.8082	0.000523	0.010351	S100 calcium binding protein A8	60B8AG, CAGA, CFAG, CGLA, CP-10, L1AG, MA387, MIF, MRP8, NIF, P8
S100A9	3.96475	0.002077	0.019102	S100 calcium binding protein A9	60B8AG, CAGB, CFAG, CGLB, L1AG, LIAG, MAC387, MIF, MRP14, NIF, P14
SOCS3	4.15302	0.001243	0.01601	suppressor of cytokine signaling 3	ATOD4, CIS3, CISH3, SOCS-3, SSI-3, SSI3
SPP1	15.793	0.000807	0.01208	secreted phosphoprotein 1	BNSP, BSPI, ETA-1, OPN
STAT6	-1.70635	0.001904	0.018678	signal transducer and activator of transcription 6, interleukin-4 induced	D12S1644, IL-4-STAT, STAT6B, STAT6C
TAP1	2.20378	0.006352	0.039893	transporter 1, ATP-binding cassette, sub-family B (MDR/TAP)	ABC17, ABCB2, APT1, D6S114E, PSF-1, PSF1, RING4, TAP1*0102N, TAP1N
THY1	2.86908	0.001354	0.017013	Thy-1 cell surface antigen	CD90, CDW90
TLR2	3.89197	0.000671	0.011426	toll-like receptor 2	CD282, TIL4
TLR8	2.72994	0.003208	0.025029	toll-like receptor 8	CD288
TNF	2.66327	0.002961	0.023826	tumor necrosis factor	DIF, TNF-ALPHA, TNFA, TNFSF2
TNFAIP3	2.58068	0.001055	0.014292	tumor necrosis factor, alpha-induced protein 3	A20, OTUD7C, TNFA1P2
TNFAIP6	7.21845	0.000438	0.0098	tumor necrosis factor, alpha-induced protein 6	TSG-6, TSG6
TNFRSF10C	3.83235	0.00027	0.0098	tumor necrosis factor receptor superfamily, member 10c, decoy without an intracellular domain	CD263, DCR1, DCR1-TNFR, LIT, TRAIL-R3, TRAILR3, TRID
TRAF1	2.33126	0.004234	0.029121	TNF receptor-associated factor 1	EBI6, MGC:10353
ZEB1	2.30638	0.002539	0.022114	zinc finger E-box binding homeobox 1	AREB6, BZP, DELTAEF1, FECD6, NIL2A, PPCD3, TCF8, ZFHEP, ZFHX1A

## Sheet: Table 4
Table 4: Correlations between the relative abundance of Fusobacterium and Immuno genes (Nanostring)
Correlation	r	95% confidence interval	P (one-tailed)
* Gene aslo significant in DEGs analysis
Fuso Rel. ab. vs. BCL6*	0.3984	-0,08252 to 0,7288	0.0456
Fuso Rel. ab. vs. CCL3*	0.5976	0,1829 to 0,8318	0.0034
Fuso Rel. ab. vs. CCL4*	0.5316	0,08764 to 0,7994	0.0096
Fuso Rel. ab. vs. CD80*	0.4458	-0,02501 to 0,7548	0.0279
Fuso Rel. ab. vs. CLEC5A*	0.4807	0,01942 to 0,7733	0.0186
Fuso Rel. ab. vs. CX3CL1*	0.602	0,1895 to 0,8339	0.0032
Fuso Rel. ab. vs. CXCL10*	0.4649	-0,0009166 to 0,7649	0.0224
Fuso Rel. ab. vs. CXCL11*	0.7526	0,4418 to 0,9021	0.0001
Fuso Rel. ab. vs. FCGR2A*	0.407	-0,07232 to 0,7336	0.0419
Fuso Rel. ab. vs. FN1*	0.614	0,2078 to 0,8396	0.0026
Fuso Rel. ab. vs. GBP5*	0.4249	-0,05073 to 0,7435	0.0349
Fuso Rel. ab. vs. GNLY*	0.5303	0,08586 to 0,7987	0.0098
Fuso Rel. ab. vs. HAVCR2*	0.4125	-0,06581 to 0,7366	0.0396
Fuso Rel. ab. vs. ICAM1*	0.393	-0,08892 to 0,7258	0.048
Fuso Rel. ab. vs. IDO1*	0.6211	0,2187 to 0,8429	0.0023
Fuso Rel. ab. vs. IL1RAP*	0.4642	-0,001776 to 0,7646	0.0226
Fuso Rel. ab. vs. IL6*	0.4985	0,04276 to 0,7825	0.0149
Fuso Rel. ab. vs. IL8*	0.4158	-0,06181 to 0,7385	0.0383
Fuso Rel. ab. vs. ITGA5*	0.5432	0,1039 to 0,8052	0.0081
Fuso Rel. ab. vs. LCP2*	0.4456	-0,02526 to 0,7547	0.0279
Fuso Rel. ab. vs. LILRA3*	0.5595	0,1270 to 0,8133	0.0064
Fuso Rel. ab. vs. LILRB3*	0.4256	-0,04989 to 0,7438	0.0346
Fuso Rel. ab. vs. MIF*	0.4982	0,04247 to 0,7824	0.015
Fuso Rel. ab. vs. MSR1*	0.4211	-0,05545 to 0,7413	0.0363
Fuso Rel. ab. vs. NFKBIA*	0.4369	-0,03604 to 0,7500	0.0307
Fuso Rel. ab. vs. NLRP3*	0.514	0,06364 to 0,7905	0.0122
Fuso Rel. ab. vs. PDGFB*	0.5062	0,05302 to 0,7864	0.0135
Fuso Rel. ab. vs. SOCS3*	0.4754	0,01260 to 0,7705	0.0198
Fuso Rel. ab. vs. SPP1*	0.5123	0,06126 to 0,7896	0.0125
Fuso Rel. ab. vs. TAP1*	0.4228	-0,05332 to 0,7423	0.0357
Fuso Rel. ab. vs. TNF*	0.5281	0,08280 to 0,7976	0.0101
Fuso Rel. ab. vs. TNFAIP3*	0.4316	-0,04262 to 0,7471	0.0325
Fuso Rel. ab. vs. TNFAIP6*	0.514	0,06364 to 0,7905	0.0122
Fuso Rel. ab. vs. ZEB1*	0.3958	-0,08562 to 0,7274	0.0467
Fuso Rel. ab. vs. ARHGDIB	0.4018	-0,07858 to 0,7307	0.0441
Fuso Rel. ab. vs. ATG16L1	0.4246	-0,05119 to 0,7433	0.035
Fuso Rel. ab. vs. BCL3	0.5456	0,1072 to 0,8064	0.0078
Fuso Rel. ab. vs. C1QBP	0.4719	0,008073 to 0,7687	0.0207
Fuso Rel. ab. vs. C2	0.7123	0,3690 to 0,8845	0.0003
Fuso Rel. ab. vs. CCL20	0.5	0,04480 to 0,7833	0.0146
Fuso Rel. ab. vs. CD44	0.493	0,03550 to 0,7796	0.016
Fuso Rel. ab. vs. CD83	0.409	-0,07001 to 0,7347	0.0411
Fuso Rel. ab. vs. CD8B	0.4102	-0,06853 to 0,7354	0.0406
Fuso Rel. ab. vs. CIITA	0.4128	-0,06537 to 0,7368	0.0395
Fuso Rel. ab. vs. CXCL9	0.5439	0,1048 to 0,8055	0.008
Fuso Rel. ab. vs. CXCR3	0.4035	-0,07649 to 0,7317	0.0433
Fuso Rel. ab. vs. DPP4	0.4596	-0,007610 to 0,7622	0.0239
Fuso Rel. ab. vs. EGR1	0.5035	0,04948 to 0,7851	0.014
Fuso Rel. ab. vs. FCER1G	0.414	-0,06392 to 0,7375	0.039
Fuso Rel. ab. vs. FKBP5	0.4502	-0,01953 to 0,7571	0.0265
Fuso Rel. ab. vs. GBP1	0.5509	0,1147 to 0,8090	0.0073
Fuso Rel. ab. vs. GPI	0.5719	0,1449 to 0,8194	0.0053
Fuso Rel. ab. vs. HLA-DMB	0.4263	-0,04905 to 0,7442	0.0344
Fuso Rel. ab. vs. ICAM4	0.504	0,05008 to 0,7853	0.0139
Fuso Rel. ab. vs. ICAM5	0.4877	0,02855 to 0,7769	0.0171
Fuso Rel. ab. vs. ICOSLG	0.407	-0,07232 to 0,7336	0.0419
Fuso Rel. ab. vs. IFNA1/13	0.5037	0,04978 to 0,7852	0.0139
Fuso Rel. ab. vs. IKBKE	0.414	-0,06392 to 0,7375	0.039
Fuso Rel. ab. vs. IL12RB1	0.4486	-0,02148 to 0,7563	0.027
Fuso Rel. ab. vs. IL23A	0.4444	-0,02671 to 0,7540	0.0283
Fuso Rel. ab. vs. ILF3	0.4561	-0,01205 to 0,7603	0.0248
Fuso Rel. ab. vs. IRF1	0.4309	-0,04346 to 0,7467	0.0328
Fuso Rel. ab. vs. IRF8	0.4912	0,03319 to 0,7787	0.0163
Fuso Rel. ab. vs. ITLN1	-0.4185	-0,7399 to 0,05853	0.0373
Fuso Rel. ab. vs. JAK1	0.4246	-0,05119 to 0,7433	0.035
Fuso Rel. ab. vs. KIR_Activating_Subgroup_1	0.425	-0,05067 to 0,7435	0.0349
Fuso Rel. ab. vs. MARCO	0.4368	-0,03614 to 0,7499	0.0307
Fuso Rel. ab. vs. NFIL3	0.4212	-0,05522 to 0,7414	0.0362
Fuso Rel. ab. vs. NFKBIZ	0.4105	-0,06813 to 0,7356	0.0404
Fuso Rel. ab. vs. PDCD2	0.4281	-0,04691 to 0,7452	0.0337
Fuso Rel. ab. vs. PLAUR	0.5281	0,08280 to 0,7976	0.0101
Fuso Rel. ab. vs. PML	0.4474	-0,02307 to 0,7556	0.0274
Fuso Rel. ab. vs. PSMB10	0.407	-0,07232 to 0,7336	0.0419
Fuso Rel. ab. vs. PSMB8	0.393	-0,08892 to 0,7258	0.048
Fuso Rel. ab. vs. PSMB9	0.5544	0,1196 to 0,8107	0.0069
Fuso Rel. ab. vs. PYCARD	0.4368	-0,03614 to 0,7499	0.0307
Fuso Rel. ab. vs. RARRES3	0.4386	-0,03397 to 0,7509	0.0302
Fuso Rel. ab. vs. SELE	0.414	-0,06392 to 0,7375	0.039
Fuso Rel. ab. vs. STAT1	0.5544	0,1196 to 0,8107	0.0069
Fuso Rel. ab. vs. TGFB1	0.393	-0,08892 to 0,7258	0.048
Fuso Rel. ab. vs. TICAM1	0.4379	-0,03482 to 0,7505	0.0304
Fuso Rel. ab. vs. TMEM173	0.4614	-0,005384 to 0,7631	0.0234
